# Supplementary material for: RNA-sequencing analysis of the effect of luteolin on methamphetamine-induced hepatotoxicity in rats: a preliminary study
Source: PeerJ. 2020 Feb 6;8:e8529. doi: 10.7717/peerj.8529 (PMC7007981; doi:10.7717/peerj.8529)
Supplement: Supplemental Information 4 [file peerj-08-8529-s004.xlsx]

## Sheet: Sheet1
Raw Data
Ctrl 1	AST(IU/L)	87
Ctrl 1	ALT(IU/L)	25
Ctrl 2	AST(IU/L)	79
Ctrl 2	ALT(IU/L)	35
Ctrl 3	AST(IU/L)	86
Ctrl 3	ALT(IU/L)	30
Ctrl 4	AST(IU/L)	89
Ctrl 4	ALT(IU/L)	40
Ctrl 5	AST(IU/L)	89
Ctrl 5	ALT(IU/L)	39
Ctrl 6	AST(IU/L)	78
Ctrl 6	ALT(IU/L)	34
METH 1	AST(IU/L)	287
METH 1	ALT(IU/L)	95
METH 2	AST(IU/L)	280
METH 2	ALT(IU/L)	105
METH 3	AST(IU/L)	347
METH 3	ALT(IU/L)	138
METH 4	AST(IU/L)	379
METH 4	ALT(IU/L)	142
METH 5	AST(IU/L)	333
METH 5	ALT(IU/L)	125
METH 6	AST(IU/L)	395
METH 6	ALT(IU/L)	141
LUT+METH 1	AST(IU/L)	125
LUT+METH 1	ALT(IU/L)	42
LUT+METH 2	AST(IU/L)	100
LUT+METH 2	ALT(IU/L)	51
LUT+METH 3	AST(IU/L)	163
LUT+METH 3	ALT(IU/L)	84
LUT+METH 4	AST(IU/L)	87
LUT+METH 4	ALT(IU/L)	39
LUT+METH 5	AST(IU/L)	100
LUT+METH 5	ALT(IU/L)	26
LUT+METH 6	AST(IU/L)	98
LUT+METH 6	ALT(IU/L)	52
